# Supplementary material for: Lithium recovery from U.S. oil and gas produced waters: resource quality and siting considerations
Source: Royal Society of Chemistry journal article supplement (doi:10.1039/d4ew00422a), 2025-01-01
Supplement: d4ew00422a1.pdf [file d4ew00422a1.pdf]

**Supporting Information for:**

**Lithium recovery from U.S. oil and gas produced waters: resource  
quality and siting considerations**

*Sheila Gerardo<sup>a</sup>, Wen Song<sup>a\*</sup>*

*<sup>a</sup>Center for Subsurface Energy and Environment, The University of Texas at Austin, Austin TX  
78712*

*\*Corresponding Author: Wen Song, email: wensong@utexas.edu*

Number of Pages: 5

Number of Figures: 3

Number of Tables: 1

| Formation  | Annual Water Production (bbls/yr) | Mean Lithium Concentration (ppm) | Total annual Lithium Resources (tons/yr) | References |
|------------|-----------------------------------|----------------------------------|------------------------------------------|------------|
| Marcellus  | 69,832,335                        | 84.0                             | 932                                      | [1], [2]   |
| Wolfcamp   | 235,714,544                       | 14.4                             | 540                                      | [2], [3]   |
| Bakken     | 104,383,524                       | 27.3                             | 452                                      | [2], [4]   |
| Smackover  | 5,813,700                         | 196.6                            | 182                                      | [2], [5]   |
| Salton Sea | 622,641,509                       | 265.0                            | 19,000                                   | [6]        |

**Table S1- Annual water Production, average lithium content, and estimated lithium resources for key formations of interest.**

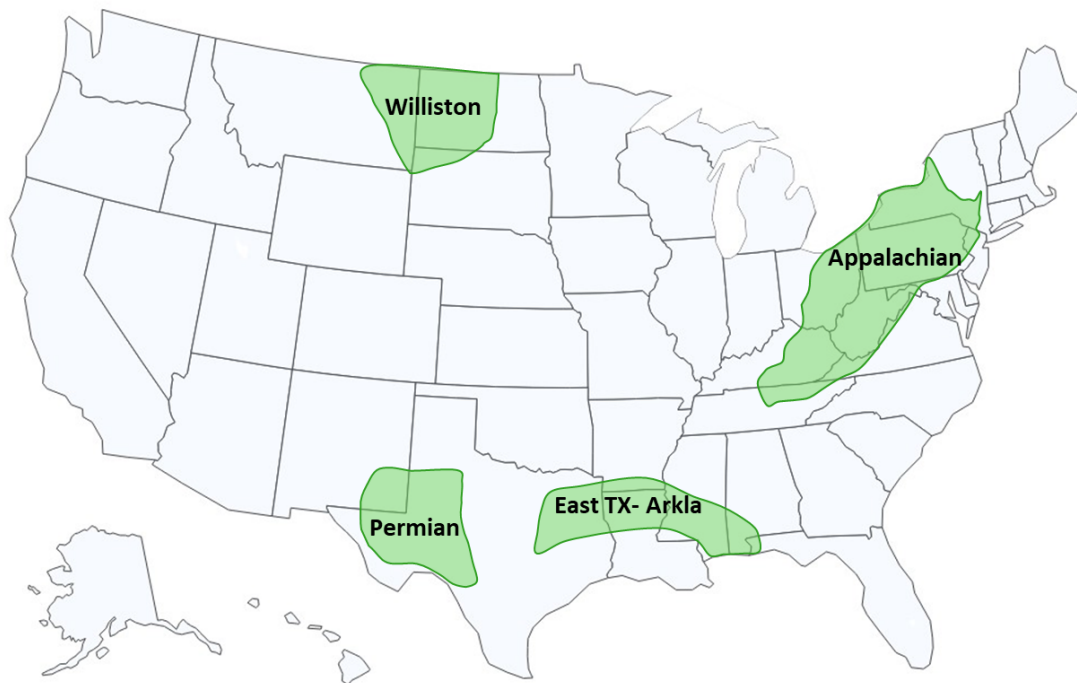

**Figure S1- U.S. Map with key O&G basins of interest highlighted.**

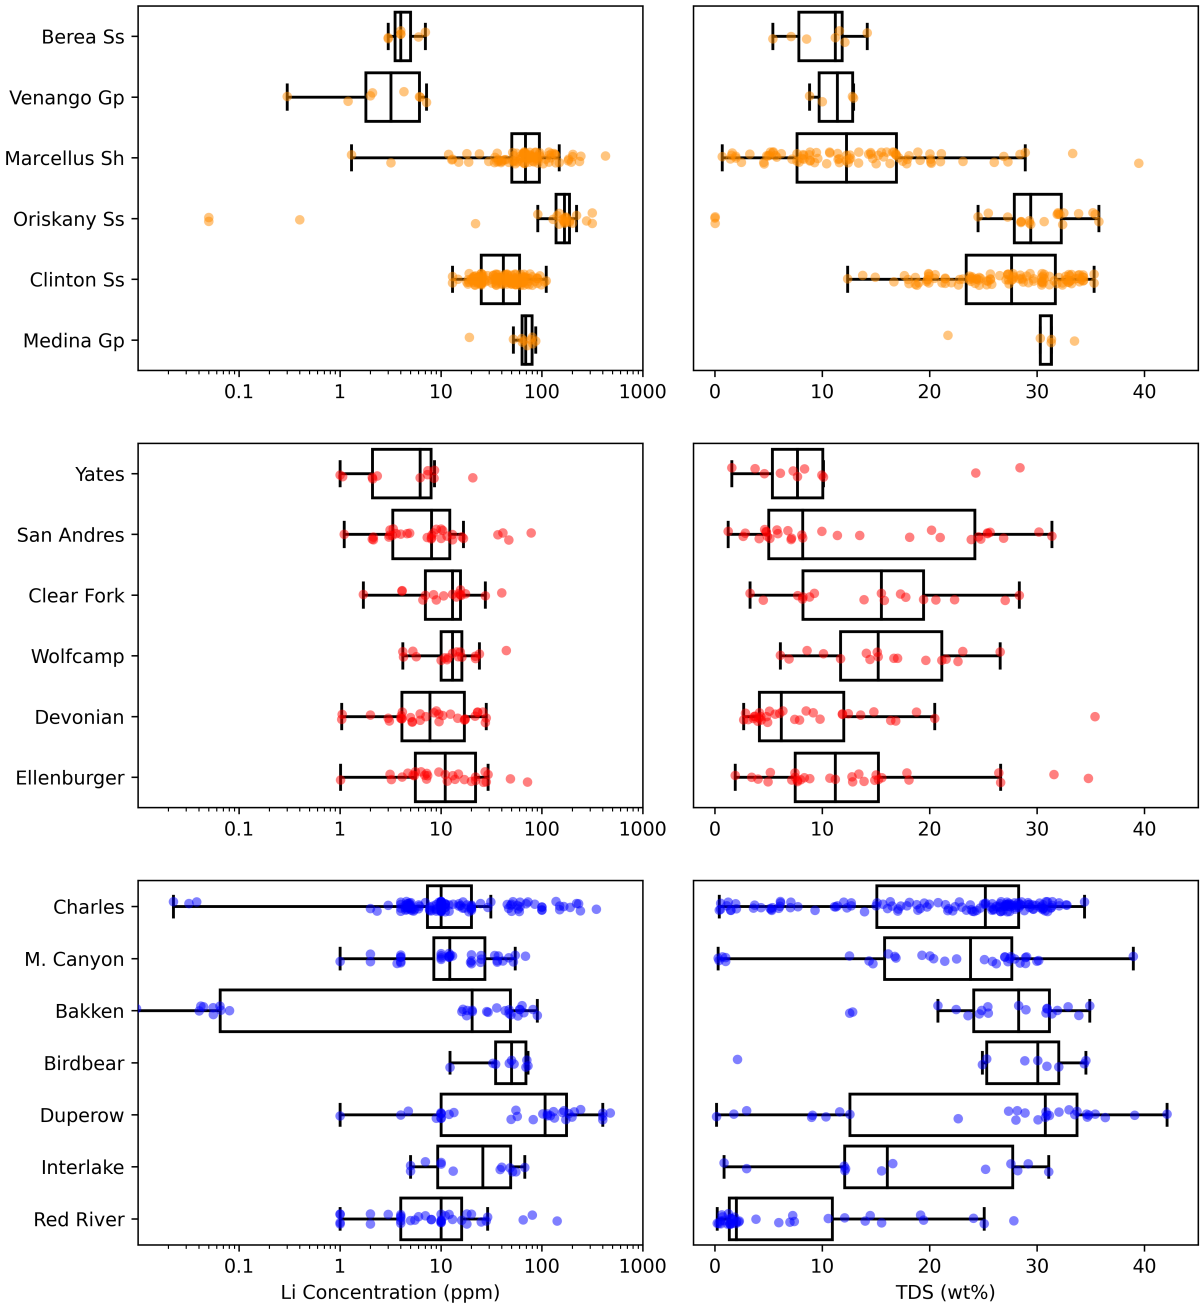

**Figure S2- Average lithium concentration vs Mg/Li ratio for key O&G plays. The formation bubble size corresponds to the TDS values obtained from the USGS database.**

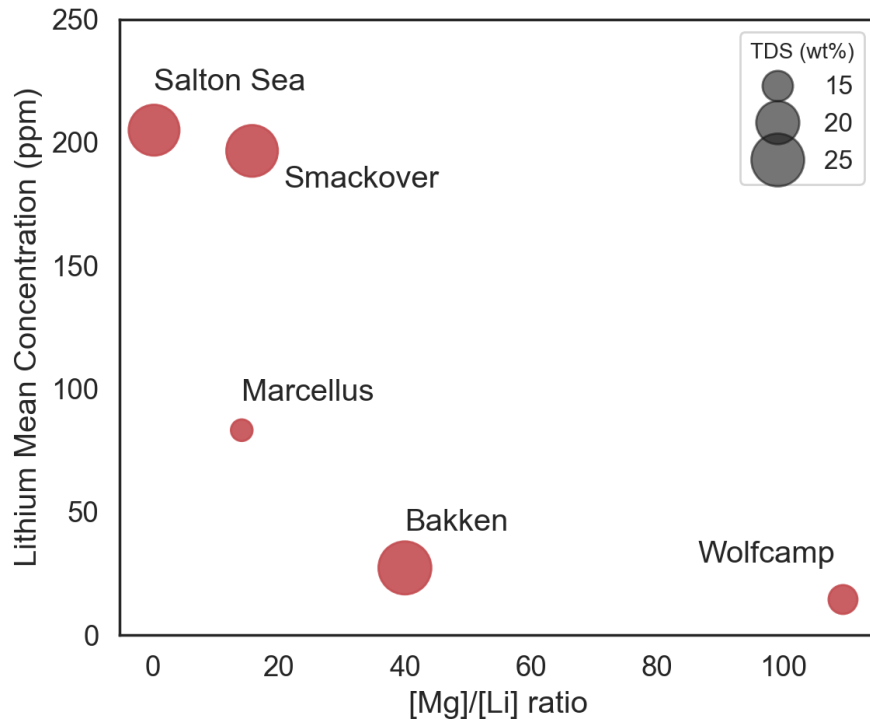

**Figure S3- Lithium concentration and TDS for key formations in the (A) Appalachian Basin, (B) Permian basin, and (C) Williston basin.**

## References

- [1] Pennsylvania Department of Environmental Protection. *Oil and Gas Production Report*. 2019. <https://greenport.pa.gov/ReportExtracts/OG/OilGasWellProdReport>
- [2] United States Environmental Protection Agency. *Technical Development Document for the Effluent Limitations Guidelines and Standards for the Oil and Gas Extraction Point Source Category*; 2016.
- [3] U.S. Energy Information Administration. *The Wolfcamp play has been key to Permian Basin oil and natural gas production growth*. 2018. <https://www.eia.gov/todayinenergy/detail.php?id=37532>.
- [4] North Dakota Mineral Resources. *Historical monthly Bakken oil production statistics*. 2019. <https://www.dmr.nd.gov/oilgas/stats/statisticsvw.asp>
- [5] Arkansas Oil and Gas Commission. *Smackover Monthly and Annual Production Graphs*. 2019. <https://www.aogc.state.ar.us/data/monthly.aspx>
- [6] Stringfellow, W. T.; Dobson, P. F. Technology for the Recovery of Lithium from Geothermal Brines. *Energies* 2021, Vol. 14, Page 6805 **2021**, 14 (20), 6805.
